# **Re-evaluating inheritance in genome evolution: widespread transfer of LINEs between species**

Atma M. Ivancevic<sup>a</sup>, R. Daniel Kortschak<sup>a</sup>, Terry Bertozzi<sup>a,b</sup>, David L. Adelson<sup>a,1</sup>

<sup>a</sup>Department of Genetics and Evolution, Biological Sciences, The University of Adelaide,  
South Australia, Australia

<sup>b</sup>Evolutionary Biology Unit, South Australian Museum, South Australia, Australia

<sup>1</sup> Correspondence to: [david.adelson@adelaide.edu.au](mailto:david.adelson@adelaide.edu.au)

**Transposable elements (TEs) are mobile DNA sequences, colloquially known as ‘jumping genes’ because of their ability to replicate to new genomic locations. Given a vector of transfer (e.g. tick or virus), TEs can jump further: between organisms or species in a process known as horizontal transfer (HT). Here we show that LINE-1 (L1) and Bovine-B (BovB), the two most abundant TE families in mammals, were initially introduced as foreign DNA via ancient HT events. Using a 503-genome dataset, we identify multiple ancient L1 HT events in plants and show that L1s infiltrated the mammalian lineage after the monotreme-therian split. We also extend the BovB paradigm by identifying more than twice the number of estimated transfer events compared to previous studies, new potential blood-sucking parasite vectors and occurrences in new lineages (e.g. bats, frog). Given that these TEs make up nearly half of the genome sequence in today’s mammals, our results provide the first evidence that HT can have drastic and long-term effects on the new host genomes. This revolutionizes our perception of genome evolution to consider external factors, such as the natural introduction of foreign DNA. With the advancement of genome sequencing technologies and bioinformatics tools, we anticipate our study to be the first of many large-scale phylogenomic analyses exploring the role of HT in genome evolution.**

## **Keywords**

Genome evolution, horizontal transfer, transposon, eukaryote, mammal

## Significance statement

LINE-1 (L1) elements occupy about half of most mammalian genomes (1), and they are believed to be strictly vertically inherited (8). Mutagenic L1 insertions are thought to account for approximately 1 of every 1000 random, disease-causing insertions in humans (4-7). Our research indicates that the very presence of L1s in humans, and other therian mammals, is due to an ancient transfer event – which has drastic implications for our perception of genome evolution. Using *a machina* analyses over 503 genomes, we trace the origins of L1 and BovB retrotransposons across the tree of life, and provide evidence of their long-term impact on eukaryotic evolution.

## Introduction

Transposable elements (TEs) are mobile segments of DNA which occupy large portions of eukaryotic genomes, including more than half of the human genome (1). Long interspersed element (LINE) retrotransposons are TEs which move from site to site using a “copy and paste” mechanism, facilitating their amplification throughout the genome (2, 3). The insertion of retrotransposons can interrupt existing genetic structures, resulting in gene disruptions, chromosomal breaks and rearrangements, and numerous diseases such as cancer (4-7). Two of the most abundant retrotransposon families in eukaryotes are LINE-1 (L1) and Bovine-B (BovB) (8, 9).

Horizontal transfer (HT) is the transmission of genetic material by means other than parent-to-offspring: a phenomenon primarily associated with prokaryotes. However, given a vector of transfer (e.g. virus, parasite), retrotransposons have the innate ability to jump between species as they do within genomes (2, 10). Studies investigating the possibility of

HT in retrotransposons are limited, mainly including CR1s and RTEs (9, 11-13). Given the limited evidence to date, we tested the hypothesis that horizontal transfer is a ubiquitous process not restricted to certain species or retrotransposons. We used L1 and BovB elements as exemplars because of their contrasting dynamics and predominance in mammalian genomes. BovB retrotransposons provide an excellent example of horizontal transfer: divergent species contain highly similar BovB sequences and the analysis of various tick species reveals a plausible vector of transfer (9). In contrast, L1 elements are believed to be only vertically inherited, based on knowledge gained primarily on mammalian organisms (8). We hypothesise that the presence of L1s in therian mammals, and absence in monotremes, is due to an ancient HT event. In this study, we use BovBs as a comparison to identify common characteristics of horizontally transferred elements in contemporary eukaryotic species.

Three criteria are typically used to detect HT candidates: 1) a patchy distribution of the TE across the tree of life; 2) unusually high TE sequence similarity between divergent taxa; and 3) phylogenetic inconsistencies between TE tree topology and species relationships (14). To comprehensively test these criteria, we performed large-scale phylogenomic analyses of over 500 eukaryotic genomes (plants and animals) using iterative similarity searches of BovB and L1 sequences.

## **Results and Discussion**

Our findings show that there are two phases in HT: effective insertion of the TE, followed by expansion throughout the genome. Figure 1 shows that both BovB and L1 elements have been horizontally transferred because of their patchy distribution across eukaryotes. Both are absent from most arthropod genomes yet appear in relatively primitive species

such as sea urchins and sea squirts. Furthermore, both TEs are present in a diverse array of species including mammals, reptiles, fish and amphibians. The main difference between BovB and L1 lies in the number of colonised species. BovBs are only present in 60 of the 503 species analysed, so it is easy to trace their horizontal transfer between the distinct clades (e.g. squamates, ruminants). In contrast, L1s encompass a total of 407 species, within plants and animals, and they are ubiquitous across the well-studied therian mammals. However they are surprisingly absent from platypus and echidna (monotremes). There are only two possible explanations for this; either L1s were expunged shortly after the monotreme-therian split but before they had a chance to accumulate, or monotremes never had L1s. The first scenario is unlikely in the context of L1 distributions in other eukaryotes. Consider the 60 currently available bird genomes: full-length L1s have all but been eradicated from the avian lineage, but every bird species bears evidence of ancient/ancestral L1 activity through the presence of fragments (15). In contrast, there are no L1 fragments in monotremes. We therefore conclude that L1s were inserted into a common ancestor of therian mammals, between 160 and 191 Million Years Ago (MYA), and have since been vertically inherited (see below).

The abundance of TEs differs greatly between species. As shown in Fig. 1, mammalian genomes are incredibly susceptible to BovB and L1 expansion. More than 15% of the cow genome is formed by these TEs (12% BovB, 3% L1). This is without considering the contribution of TE fragments (16) or derived Short INterspersed Elements (SINEs), boosting retrotransposon coverage to almost 50% in mammalian genomes (1). Even within mammals there are noticeable differences in copy number; for example, bats and equids have a very low number of full-length BovBs (<50 per genome) compared to the thousands found in ruminants and Afrotherian mammals. The low copy number here is

TE-specific rather than species-specific; there are many L1s in bats and equids. Hence, the rate of TE propagation is determined both by the genome environment (e.g. mammal versus non-mammal) and the type of retrotransposon (e.g. BovB versus L1).

To develop a method for identifying horizontal transfer events, we used BovB, a TE known to undergo HT. We clustered and aligned BovB sequences (both full-length nucleotide sequences and amino acid reverse-transcriptase domains) to generate a representative consensus for each species, and infer a phylogeny (Fig 2a shows the nucleotide-based tree). The phylogeny supports previous results (9) — with the topology noticeably different from the tree of life (Fig. 1) — although we were able to refine our estimates for the times of insertion. For example, the cluster of equids includes the white rhino, *Ceratotherium simum*, suggesting that BovBs were introduced into the most recent common ancestor before these species diverged. The low copy number in equids and rhino, observed in Fig. 1, is not because of a recent insertion event. The most likely explanation is that the donor BovB inserted into an ancestral genome, was briefly active, lost its ability to retrotranspose and was subsequently inherited by its descendants.

The placement of arthropods is intriguing, revealing potential HT vectors and the origin of BovB retrotransposons. For example, BovBs from butterflies, moths and ants appear as a basal monophyletic group, sister to sea squirt *Ciona savignyi* BovB. The presence of BovB in all these species suggests that BovB TEs may have arisen as a subclass of ancient RTEs, countering the belief that they originated in squamates (13). The next grouping consists of two scorpion species (*Mesobuthus martensii* and *Centruroides exilicauda*) nestled among the snakes, fish, sea urchin and leech — a possible vector. But the most interesting arthropod species is *Cimex lectularius*, the common bed bug, known to feed on

animal blood. The full-length BovB sequence from *Cimex* shares over 80% identity to viper and cobra BovBs; their reverse transcriptase domains share over 90% identity at the amino acid level. Together, the bed bug and leech support the idea (9) that blood-sucking parasites can transfer retrotransposons between the animals they feed on.

We extended the BovB paradigm to include 10 bat species and one frog (*Xenopus tropicalis*). The bats were not included in the phylogenetic analysis because their BovB sequences were too divergent to construct an accurate consensus. Instead, we clustered all individual BovB sequences to identify two distinct subfamilies (Fig. 2b); one containing all the horse and rhino BovBs as well as eight bat sequences, and the other containing the remaining bat BovBs as well as the single BovB from *Xenopus*. We also included three annotated sequences from a public database (17) to resolve an apparent discrepancy between the naming of BovB/RTE elements. Our results have several implications: first, bat BovBs can be separated into two completely distinct clades, suggesting bat BovBs arose from independent insertion events; second, the BovBa-1-EF bat clade may have arisen from an amphibian species, or vice versa; and third, the naming conventions used in RepBase (17) need updating to better distinguish BovB and RTE sequences. This third point is discussed in the Supplementary Information (see Supp. Fig. 1).

In order to exhaustively search for all cases of BovB HT, we replicated the all-against-all BLAST (18) approach used in El Baidouri *et al.* (2014) (19) to detect individual HT candidate sequences. Briefly, this compares all sequences within a database to generate BovB clusters or families. We identified 215 HT candidate families which contained BovBs belonging to at least two different eukaryotic species. Many of these were closely related species; so to find the HT families most likely to be true events we restricted the

analysis to families that linked species in different eukaryotic Orders (e.g. Afrotheria and Monotremata). We performed *a machina* validation for each candidate HT family: pairwise alignments of the flanking regions to rule out possible contamination or orthologous regions, and phylogenetic reconstructions to confirm discordant relationships. A total of 22 HT families passed all of the tests, indicating at least 22 cross-Order HT events. Many HT families included one or two reptile BovBs, and numerous mammalian BovBs (see Supp. Table 6). This is important for determining the direction of transfer. BovBs are thought to have entered ruminants after squamates (13). The single reptile element in a family is therefore likely to be the original transferred sequence, supporting the theory that retrotransposons undergo HT to escape host suppression or elimination (19). Altogether, our results demonstrate that the horizontal transfer of BovB elements is even more widespread than previously reported, providing one of the most compelling examples of eukaryotic horizontal transfer to date.

We carried out the same exhaustive search in L1s, which presented a challenge because of greater divergence and a strong vertical background. Producing a consensus for each species was impractical as most species contained a divergent mixture of old, degraded L1s and young, intact L1s. Instead, we used the all-against-all clustering strategy on the collated dataset of L1 nucleotide sequences over 3kb in length (>1 million sequences total). 2815 clusters contained L1s from at least two different species; these were our HT candidates. As with BovBs, to improve recognition of HT we looked for families displaying cross-Order transfer. Most non-mammalian L1s (insects, reptiles, amphibians) had already been excluded because they definitively grouped into species-specific clusters, even at low (50%) clustering identity. The remaining families were from plants and mammals. After the validation tests, we found that all the mammalian candidate families



were very small (e.g. one L1 element per species), and located in repeat-dense, orthologous regions in the genome most likely explained by vertical inheritance (see Supp. Fig. 3). Thus, we found no evidence for recent L1 transfer since their insertion into the therian mammal lineage and subsequent shaping of modern therian genomes.

Nevertheless, four plant families presented a strong case for L1 horizontal transfer (Fig 3a). High sequence identity was restricted to the elements themselves, there were more than two L1 elements in each family, the sequences encoded open reading frames or had intact reverse-transcriptase domains, and the phylogenetic reconstructions showed evolutionary discordance. The number of elements in each family mimicked the patterns seen with BovBs: very few elements from the ‘donor species’, and a noticeable expansion of L1s in the ‘host species’. This indicates that transferred L1s can retain activity and expand within their new host. Moreover, it contradicts the belief that L1s are exclusively vertically inherited, and supports our conclusion that a similar event introduced L1s to mammals. At this stage, we do not know the vector of transfer since none of the analysed arthropods showed similarity to plant L1 sequences.

During our mining of candidate L1 HT families, we serendipitously discovered a chimeric L1-BovB element present in cattle genomes (*Bos taurus* and *Bos indicus*), shown in Fig. 3b. This particular element most likely arose from a recently active L1 element (98% identical to the canonical *Bos* L1-BT (17)) inserting into an active BovB (97% identical to *Bos* BovB (17)). In fact, L1s and BovBs have accumulated to such extents in these two genomes that they have created the ideal environment for chimeric repetitive elements. With two reverse-transcriptase domains and high similarity to currently active L1/BovB elements, this chimeric element has the potential to still be functional - presenting the

possibility for L1 elements to be horizontally transferred throughout mammals by being transduced by BovBs.

In conclusion, both BovB and L1 retrotransposons can undergo HT, albeit at different rates. We extracted millions of retrotransposon sequences from a 503-genome dataset, demonstrating the similarly patchy distributions of these two LINE classes across the eukaryotic tree of life. We further extended the analysis of BovBs to include blood-sucking arthropods capable of parasitising mammals and squamates, as well as two distinct clades of bat BovBs and the first report of BovB in an amphibian. Contrary to the belief of exclusive vertical inheritance, our results with L1s suggest multiple ancient HT events in plants and, strikingly, HT into the early therian mammal lineage. The rapid speciation following the split of theria and australosphenids (monotremes), between 160-220 MYA, coincides with the invasion of L1 elements into therian genomes. We therefore speculate that the speciation of therian mammals was driven in part by the effect of L1 retrotransposition on genome structure and function (including regulatory effects on transcriptional networks). This ancient transfer event allowed expansion of L1s and associated SINEs, transformation of genome structure and regulation in mammals (7) and potentially catalysed the therian radiation.

## **Materials and Methods**

Detailed description of the methods, including tables and figures, are available in the Supplementary Information.

### Extraction of L1 and BovB retrotransposons from genome data

To extract the retrotransposons of interest, we used the methods and genomes previously described in Ivancevic *et al.* (2016) (15). Briefly, this involved downloading 499 publicly available genomes (and acquiring four more from collaborations), then using two independent searching strategies (LASTZ (20) and TBLASTN (18)) to identify and characterise L1 and BovB elements. A third program, CENSOR (21), was used with the RepBase library of known repeats (17) to verify hits with a reciprocal best-hit check. The raw L1 results have been previously published in Ivancevic *et al.* (15) (Supplementary Material); the BovB results are included in the Supplementary Information.

### Extraction and clustering of conserved amino acid residues

Starting with BovBs, USEARCH (22) was used to find open readings frames (ORFs), with function -fastx\_findorfs and parameters -aaout (for amino acid output) and -orfstyle 7 (to allow non-standard start codons). HMMer (23) was used to identify reverse transcriptase (RT) domains within the ORFs. RT domains were extracted using the envelope coordinates from the HMMer domain hits table (-domtblout), with minimum length 200 amino acid residues. The BovB RT domains from all species were collated into one file and clustered with UCLUST (22). This was done as an initial screening to detect potential horizontal transfer candidates. The process was then repeated with L1 elements.

### Clustering of nucleotide sequences to build one consensus per species

The canonical BovB retrotransposon is 3.2 kb in length (9, 17), although this varies slightly between species. In this study, we classified BovB nucleotide sequences  $\geq 2.4$ kb and  $\leq 4$ kb as full-length. We wanted to construct a BovB representative for each species. Accordingly, for each species, UCLUST (22) was used to cluster full-length BovB

sequences at varying identities between 65-95%. A consensus sequence of each cluster was generated using the UCLUST -consout option.

The ideal cluster identity was chosen based on the number and divergence of sequences in a cluster. E.g. for species with few BovBs, a lower identity was allowed; whereas for species with thousands of BovBs, a higher identity was needed to produce an alignable cluster. The final clustering identity and cluster size for each species are given in Supp. Table 1. Note that the bat species are not included in this table - they were clustered separately, due to the high level of divergence between BovBs.

This method was tested on L1 retrotransposons, but the results were not ideal; most species simply had too many L1 sequences. Other methods tested on both BovBs and L1s included using centroids instead of consensus sequences (this gave better alignments but was less representative of the cluster), and using the same clustering identity for all species (e.g. 80% - this did not work well for species with less than 100 elements in the genome).

### Inferring a phylogeny from consensus sequences

Consensus sequences were aligned with MUSCLE (24). The multiple alignment was processed with Gblocks (25) to extract conserved blocks, with default parameters except min block size: 5, allowed gaps: all. FastTree (26) was used to infer a maximum likelihood phylogeny using a general time reversible (GTR) model and gamma approximation on substitution rates. Geneious Tree Builder (27) was used to infer a second tree using the neighbour-joining method with 1000 bootstrap replicates.

### Distinguishing RTEs from BovBs

All sequences which identified as BovB or RTE were kept and labelled accordingly to their closest RepBase classification (17). However, there appeared to be numerous discrepancies with the naming: e.g. some RTE sequences shared >90% identity to BovBs, and vice versa. BovB retrotransposons are a subclass of RTE, and they were only discovered relatively recently. It is likely that several so-called RTE sequences are actually BovBs.

To determine which species had BovB sequences, and which only had RTEs, we used the species consensus approach to build a BovB/RTE phylogeny (see Supp. Figure 1). This effectively separated BovB-containing species from RTE-containing species. The RTE sequences were not included in further analyses.

### Clustering of nucleotide BovB sequences from bats and *Xenopus*

A reliable BovB consensus could not be generated for any of the ten bat species because the sequences were too divergent and degraded. Some bat BovBs seemed similar to equid BovBs; others did not. Likewise, the single full-length BovB from frog *Xenopus tropicalis* was very different to canonical BovBs, sharing highest identity with the bats.

In an effort to characterise these BovBs into families, we grouped all full-length BovB sequences from the bats, frog, equids and white rhino into a single file. We also added two RepBase equid sequences (RTE-1\_EC and BovB\_Ec) and 1 RepBase bat sequence (BovBa-1\_EF) (17). After clustering, we expected to find one family of equid BovBs, the equid RTE sequence as an outlier, and numerous families containing bat and frog BovBs.

The actual findings are described in the text (Fig. 2b). We used UCLUST (22) to cluster the sequences (function `-cluster_fast` with parameters `-id`, `-uc`, `-clusters`). The highest identity at which there were only 2 clusters/families was 40%. At higher identities, the equid BovBs stayed together but the bat and frog BovBs were lost as singletons.

To confirm the clustering, we also used MUSCLE to align all the sequences and FastTree to infer a phylogeny (see Supp. Figure 2).

### HT candidate identification - BovBs and L1s

We compiled all confirmed BovB and L1 sequences into separate multi-fasta databases (316,017 and 1,048,478 sequences respectively). The length cut-off for BovBs was  $\leq 2.4\text{kb}$  and  $\geq 4\text{kb}$ ; for L1s,  $\geq 3\text{kb}$ . BovBs were analysed first to identify characteristics of horizontal transfer events.

To detect HT candidates, we used the all-against-all clustering strategy described in El Baidouri *et al.* (2014) (19). Briefly, this method used a nucleotide BLAST (18) to compare every individual sequence in a database against every other sequence; hence the term all-against-all. BLAST parameters were as follows: `-r 2`, `-e 1e-10`, `-F F`, `-m 8` (for tabular output). The SiLiX program (28) was then used to filter the BLAST output and produce clusters or families that met the designated identity threshold.

For BovB sequences, we tested identities of 40-90%. High identity thresholds were useful for finding very recent HT events (e.g. over 90% identity between the bed bug and snakes). However, the majority of clusters contained several copies of the same BovB family from a single species - indicative of vertical inheritance. Using a lower identity

threshold was more informative for capturing ancient HT events. At 50% identity, the clustering preserved the recent, high-identity HT events while also finding the ancient, lower-%identity HT events. We concluded that this was the best %identity to use for our particular dataset, considering it includes widely divergent branches of Eukaryota.

Clusters were deemed HT candidates if they contained BovB elements belonging to at least two different species. To reduce the number of possible HT clusters, we went one step further and kept only the clusters which demonstrated cross-Order transfer (e.g. BovBs from Monotremata and Afrotheria in the same cluster). All potential HT candidates were validated by checking that they were not located on short, isolated scaffolds or contigs in the genome. The flanking regions of each HT candidate pair were extracted and checked (via pairwise alignment) to ensure that the high sequence identity was restricted to the BovB region. This was done to check for contamination or orthologous regions. Phylogenies of HT candidate clusters were inferred using maximum likelihood and neighbour-joining methods (1000 bootstraps).

The same procedure was performed to screen for nucleotide L1 HT candidates. As an extra step for L1s, we also used all ORF1 and ORF2 amino acid sequences from a previous analysis (15) to conduct similar all-against-all BLAST searches. However, the amino acid clusterings did not produce any possible HT candidates.

## **Acknowledgements**

The authors wish to acknowledge Olivier Panaud and Steve Turner for helpful discussions, Reuben Buckley and Lu Zeng for ideas and moral support, Brittany Howell

for proof reading and providing a much needed sanity check and Matt Westlake for HPC support above and beyond the call of duty.

### **Author contributions**

A.M.I. performed the analysis, interpreted the results and wrote the manuscript. R.D.K, T.B. and D.L.A. supervised the development of work and assisted in analysing the results and writing the manuscript. T.B. provided access to DNA samples and performed laboratory validation experiments.

The authors declare no conflict of interest.

### **Corresponding author**

Correspondence to: David L. Adelson, [david.adelson@adelaide.edu.au](mailto:david.adelson@adelaide.edu.au)

### **Supplementary information**

Additional supplementary information is provided in the attached PDF.

### **Data availability**

Data generated or analysed during this study are included in the main text and Supplementary Information. Raw sequences are provided upon request.

### **References**

1. Prak ETL & Kazazian HH (2000) Mobile elements and the human genome. *Nature Reviews Genetics* 1(2):134-144.
2. Piskurek O & Jackson DJ (2012) Transposable Elements: From DNA Parasites to Architects of Metazoan Evolution. *Genes-Basel* 3(3):409-422.
3. Feschotte C (2008) Transposable elements and the evolution of regulatory networks. *Nature reviews. Genetics* 9(5):397-405.



4. Chen JM, Stenson PD, Cooper DN, & Ferec C (2005) A systematic analysis of LINE-1 endonuclease-dependent retrotranspositional events causing human genetic disease. *Human genetics* 117(5):411-427.
5. Kaer K & Speek M (2013) Retroelements in human disease. *Gene* 518(2):231-241.
6. Kazazian HH, Jr. (1998) Mobile elements and disease. *Current opinion in genetics & development* 8(3):343-350.
7. Chuong EB, Elde NC, & Feschotte C (2017) Regulatory activities of transposable elements: from conflicts to benefits. *Nat Rev Genet* 18(2):71-86.
8. Waters PD, Dobigny G, Waddell PJ, & Robinson TJ (2007) Evolutionary history of LINE-1 in the major clades of placental mammals. *PloS one* 2(1):e158.
9. Walsh AM, Kortschak RD, Gardner MG, Bertozzi T, & Adelson DL (2013) Widespread horizontal transfer of retrotransposons. *Proceedings of the National Academy of Sciences of the United States of America* 110(3):1012-1016.
10. Ivancevic AM, Walsh AM, Kortschak RD, & Adelson DL (2013) Jumping the fine LINE between species: Horizontal transfer of transposable elements in animals catalyses genome evolution. *BioEssays : news and reviews in molecular, cellular and developmental biology* 35(12):1071-1082.
11. Sormacheva I, *et al.* (2012) Vertical Evolution and Horizontal Transfer of CR1 Non-LTR Retrotransposons and Tc1/mariner DNA Transposons in Lepidoptera Species. *Molecular biology and evolution* 29(12):3685-3702.
12. Suh A, *et al.* (2016) Ancient horizontal transfers of retrotransposons between birds and ancestors of human pathogenic nematodes. *Nat Commun* 7.
13. Kordis D & Gubensek F (1999) Horizontal transfer of non-LTR retrotransposons in vertebrates. *Genetica* 107(1-3):121-128.
14. Schaack S, Gilbert C, & Feschotte C (2010) Promiscuous DNA: horizontal transfer of transposable elements and why it matters for eukaryotic evolution. *Trends in ecology & evolution* 25(9):537-546.
15. Ivancevic AM, Kortschak RD, Bertozzi T, & Adelson DL (2016) LINEs between Species: Evolutionary Dynamics of LINE-1 Retrotransposons across the Eukaryotic Tree of Life. *Genome biology and evolution* 8(11):3301-3322.
16. Adelson DL, Raison JM, & Edgar RC (2009) Characterization and distribution of retrotransposons and simple sequence repeats in the bovine genome. *Proceedings of the National Academy of Sciences of the United States of America* 106(31):12855-12860.
17. Jurka J, *et al.* (2005) Repbase Update, a database of eukaryotic repetitive elements. *Cytogenetic and genome research* 110(1-4):462-467.
18. Altschul SF, Gish W, Miller W, Myers EW, & Lipman DJ (1990) Basic local alignment search tool. *Journal of molecular biology* 215(3):403-410.
19. El Baidouri M, *et al.* (2014) Widespread and frequent horizontal transfers of transposable elements in plants. *Genome research* 24(5):831-838.
20. Harris RS (2007) *Improved Pairwise Alignment of Genomic DNA* (Ph.D. Thesis, The Pennsylvania State University).
21. Kohany O, Gentles AJ, Hankus L, & Jurka J (2006) Annotation, submission and screening of repetitive elements in Repbase: RepbaseSubmitter and Censor. *BMC bioinformatics* 7:474.
22. Edgar RC (2010) Search and clustering orders of magnitude faster than BLAST. *Bioinformatics* 26(19):2460-2461.

23. Finn RD, Clements J, & Eddy SR (2011) HMMER web server: interactive sequence similarity searching. *Nucleic acids research* 39(Web Server issue):W29-37.
24. Edgar RC (2004) MUSCLE: multiple sequence alignment with high accuracy and high throughput. *Nucleic acids research* 32(5):1792-1797.
25. Castresana J (2000) Selection of conserved blocks from multiple alignments for their use in phylogenetic analysis. *Molecular biology and evolution* 17(4):540-552.
26. Price MN, Dehal PS, & Arkin AP (2010) FastTree 2--approximately maximum-likelihood trees for large alignments. *PloS one* 5(3):e9490.
27. Kearse M, *et al.* (2012) Geneious Basic: an integrated and extendable desktop software platform for the organization and analysis of sequence data. *Bioinformatics* 28(12):1647-1649.
28. Miele V, Penel S, & Duret L (2011) Ultra-fast sequence clustering from similarity networks with SiLiX. *BMC bioinformatics* 12:116.
29. Maddison DR & Schulz KS (2007) The Tree of Life Web Project.
30. Letunic I & Bork P (2016) Interactive tree of life (iTOL) v3: an online tool for the display and annotation of phylogenetic and other trees. *Nucleic acids research* 44(W1):W242-W245.
31. Kumar S & Hedges SB (2011) TimeTree2: species divergence times on the iPhone. *Bioinformatics* 27(14):2023-2024.

## Figure legends

Figure 1: **Presence and coverage of L1 and BovB elements across eukaryotes.** The Tree of Life (29) was used to infer a tree of the 503 species used in this study; iTOL (30) was used to generate the bar graph and final graphic. The red arrow marks the L1 horizontal transfer event into therian mammals between 163-191 MYA. Branches are coloured to indicate which species have both BovB and L1 (green), only BovB (orange), only L1 (blue), or neither (black). Bar graph colours correspond to BovB (orange) and L1 (blue). An interactive version of this figure is available at: <http://itol.embl.de/shared/atma>.

Figure 2: **HT of BovB retrotransposons.** (2a) Neighbour-joining tree (1000 bootstrap replicates) inferred using full-length nucleotide BovB consensus sequences, representing the dominant BovB family in each species. Nodes with confidence values over 50% are labelled and branches are coloured taxonomically. RTE sequence from *Schistosoma*

*mansoni* was used as the outgroup. (2b) Network diagram representing the two distinct BovB clades in bats. Nodes are coloured taxonomically apart from the RepBase (17) sequences (light brown). RTE-1\_EC and BovB\_Ec are shown to belong to a single family, while BovBa-1\_EF-like bat sequences form a separate family containing a single full-length BovB from the frog *Xenopus*.

**Figure 3: HT of L1 in plants and newfound chimeric L1-BovB element.** (3a) TimeTree (31) illustrating the putative L1 horizontal transfer events between plant species. Shows only the species involved in HTs, and *Amborella trichopoda* as the outgroup. Background is coloured to match the ages in the geological timescale. (3b) Chimeric L1-BovB retrotransposon found in cattle genomes (*Bos taurus* and *Bos indicus*). L1-BT and BovB correspond to RepBase names (17), representing repeats which are known to have been recently active. RVT\_1 = reverse-transcriptase, EN = endonuclease domain. The orange bar is the length of the entire open reading frame.

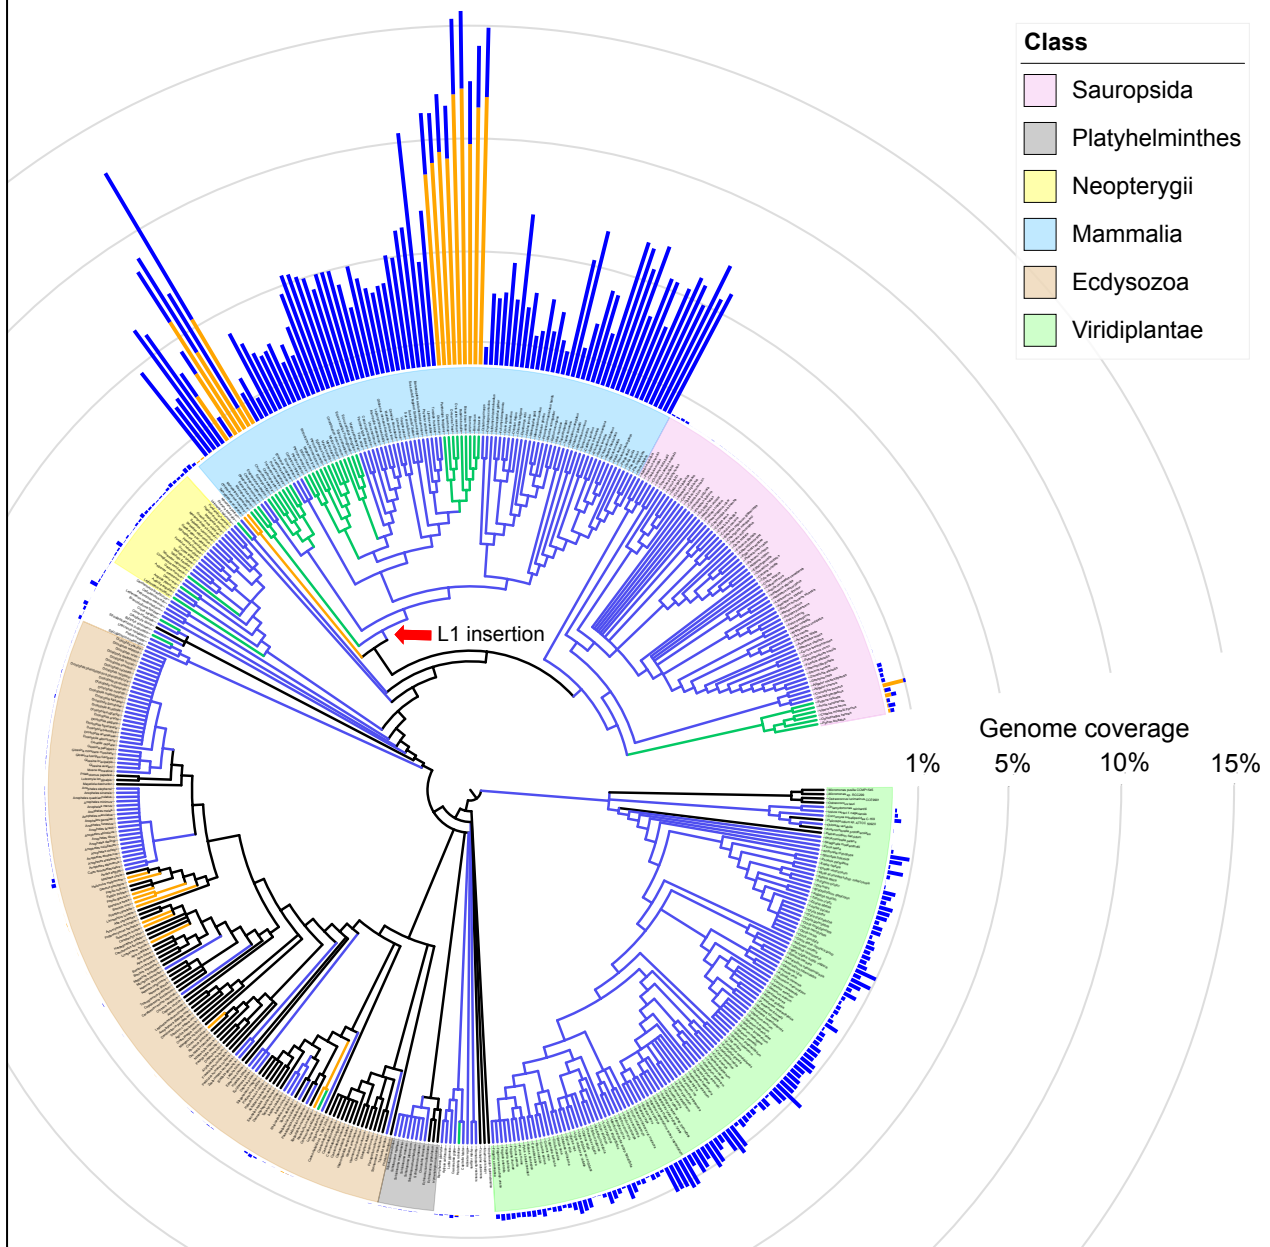

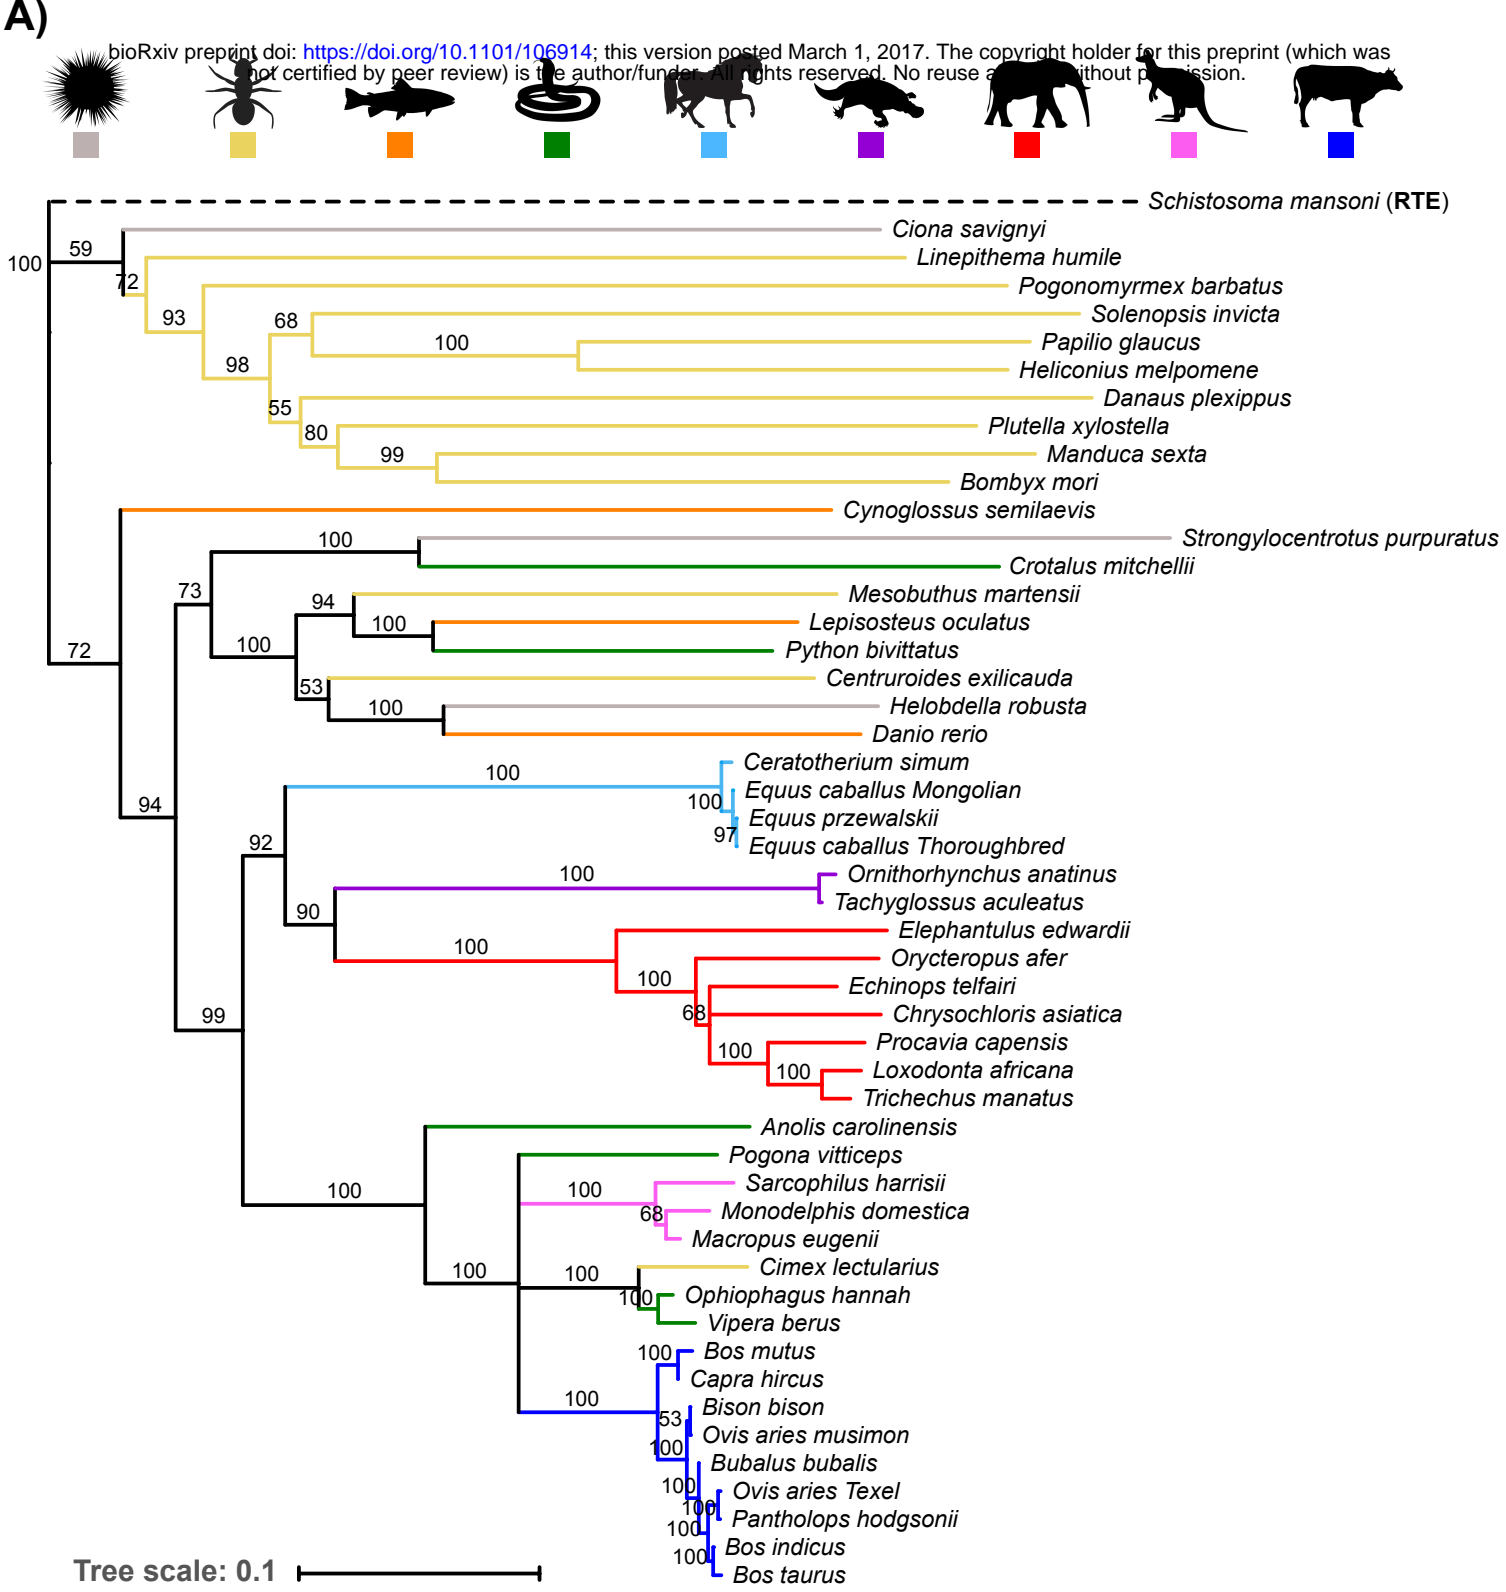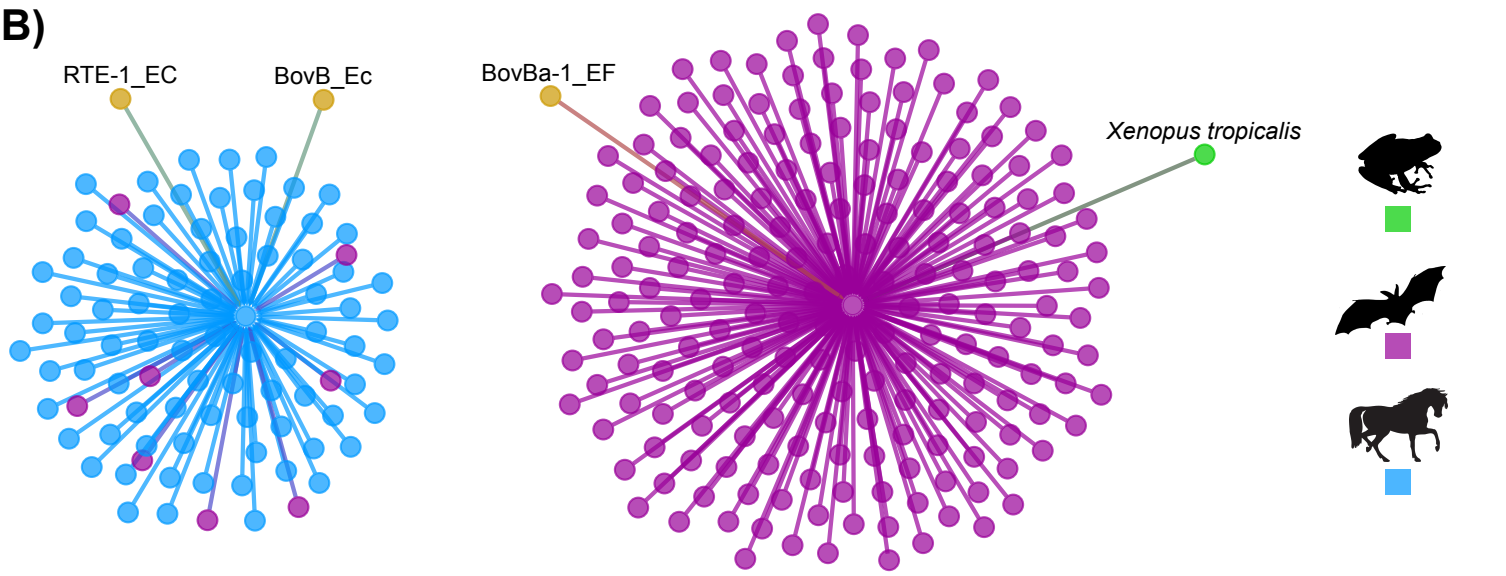

A)

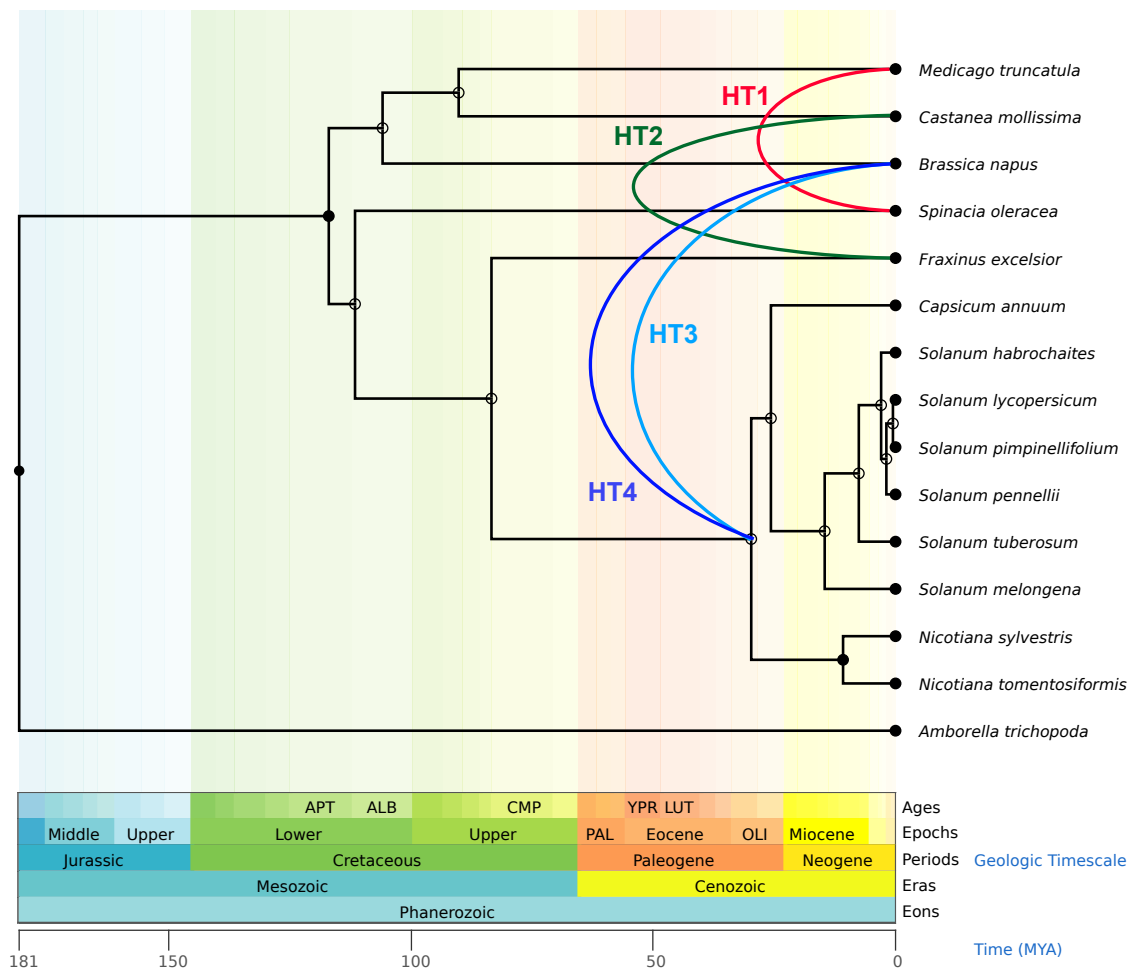

B)

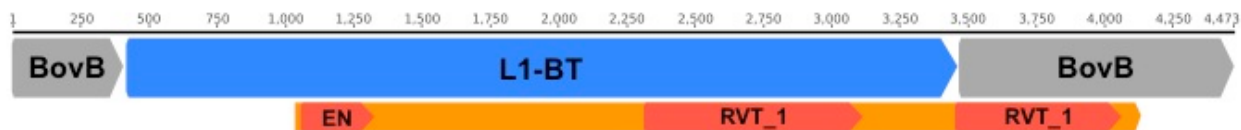

Source: http://biorxiv.org/content/10.1101/106914v2.full.pdf
